# Supplementary material for: Triphenyltin(IV) Carboxylates with Exceptionally High Cytotoxicity against Different Breast Cancer Cell Lines
Source: MDPI journal article supplement (doi:10.3390/biom13040595), 2023-03-26
Supplement: s1 [file s1]

# **Triphenyltin(IV) Carboxylates with Exceptionally High Cytotoxicity against Different Breast Cancer Cell Lines**

Ivana Predarska, Mohamad Saoud, Ibrahim Morgan, Peter Lönnecke, Goran N. Kaluđerović\* and Evamarie Hey-Hawkins\*

## **Electronic Supplementary Information**

### **Table of Contents**

|                                                                                                                                                 |    |
|-------------------------------------------------------------------------------------------------------------------------------------------------|----|
| <b>Characterization of complexes</b> .....                                                                                                      | 2  |
| NMR Spectra of $[\text{Ph}_3\text{Sn}(\text{IND})]$ .....                                                                                       | 2  |
| Mass Spectrum of $[\text{Ph}_3\text{Sn}(\text{IND})]$ .....                                                                                     | 4  |
| X-ray Crystallography .....                                                                                                                     | 6  |
| NMR Spectra of $[\text{Ph}_3\text{Sn}(\text{FBP})]$ .....                                                                                       | 7  |
| Mass Spectra of $[\text{Ph}_3\text{Sn}(\text{FBP})]$ .....                                                                                      | 10 |
| <b>Stability of complexes <math>[\text{Ph}_3\text{Sn}(\text{IND})]</math> and <math>[\text{Ph}_3\text{Sn}(\text{FBP})]</math> in DMSO</b> ..... | 11 |
| <b>Cell viability of complexes</b> .....                                                                                                        | 12 |

## Characterization of complexes

### NMR Spectra of $[\text{Ph}_3\text{Sn}(\text{IND})]$

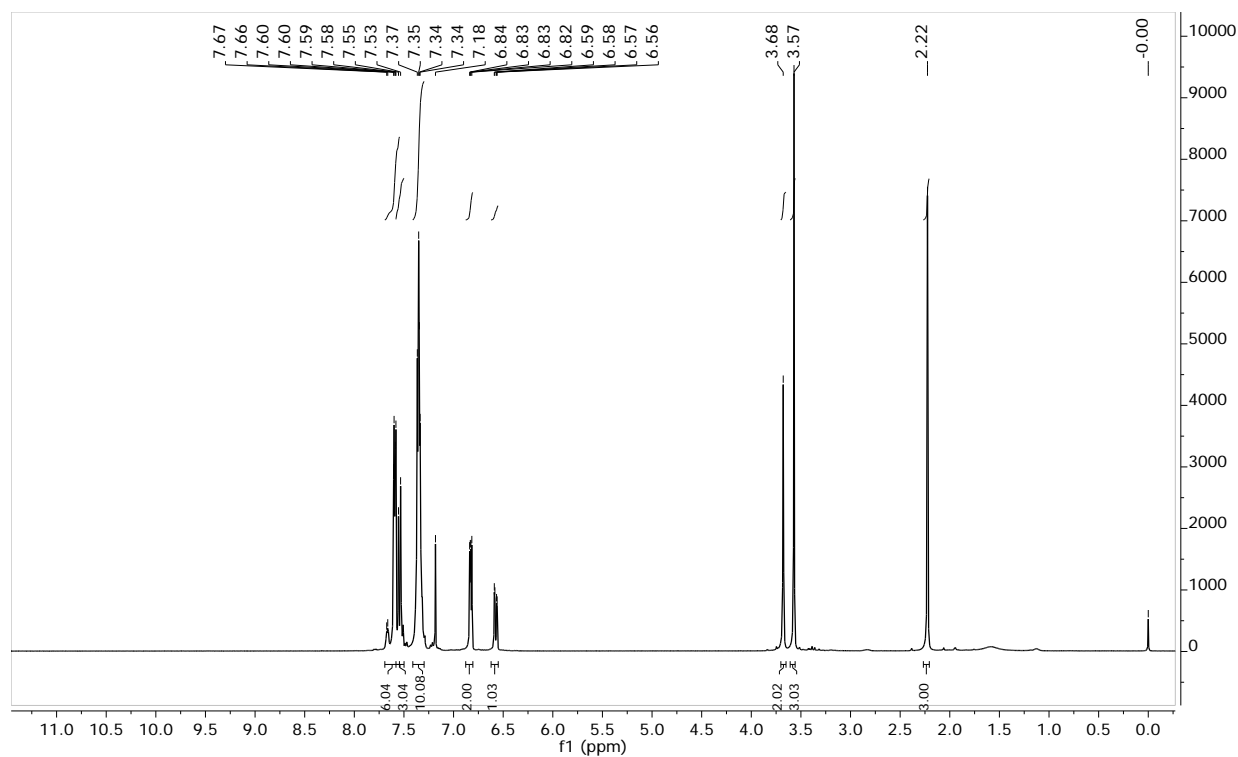

**Figure S1.**  $^1\text{H}$  NMR spectrum of  $[\text{Ph}_3\text{Sn}(\text{IND})]$  in  $\text{CDCl}_3$ .

**$^1\text{H}$  NMR ( $\text{CDCl}_3$ , ppm, 400 MHz):**  $\delta$  = 7.67 – 7.58 (m, br., 6H,  $\text{CH}_{\text{aryl}}$ ), 7.54 (d,  $^3J_{\text{HH}}$  = 8 Hz, 3H,  $\text{CH}_{\text{aryl}}$ ), 7.37 – 7.34 (m, br., 10H,  $\text{CH}_{\text{aryl}}$ ), 6.83 (dd,  $^3J_{\text{HH}}$  = 8 Hz,  $^4J_{\text{HH}}$  = 2 Hz 2H,  $\text{CH}_{\text{aryl}}$ ), 6.57 (dd,  $^3J_{\text{HH}}$  = 8 Hz,  $^4J_{\text{HH}}$  = 2 Hz 1H,  $\text{CH}_{\text{aryl}}$ ), 3.68 (s, 2H,  $\text{CH}_2$ ), 3.75 (s, 3H,  $\text{OCH}_3$ ), 2.22 (s, 3H,  $\text{CH}_3$ ).

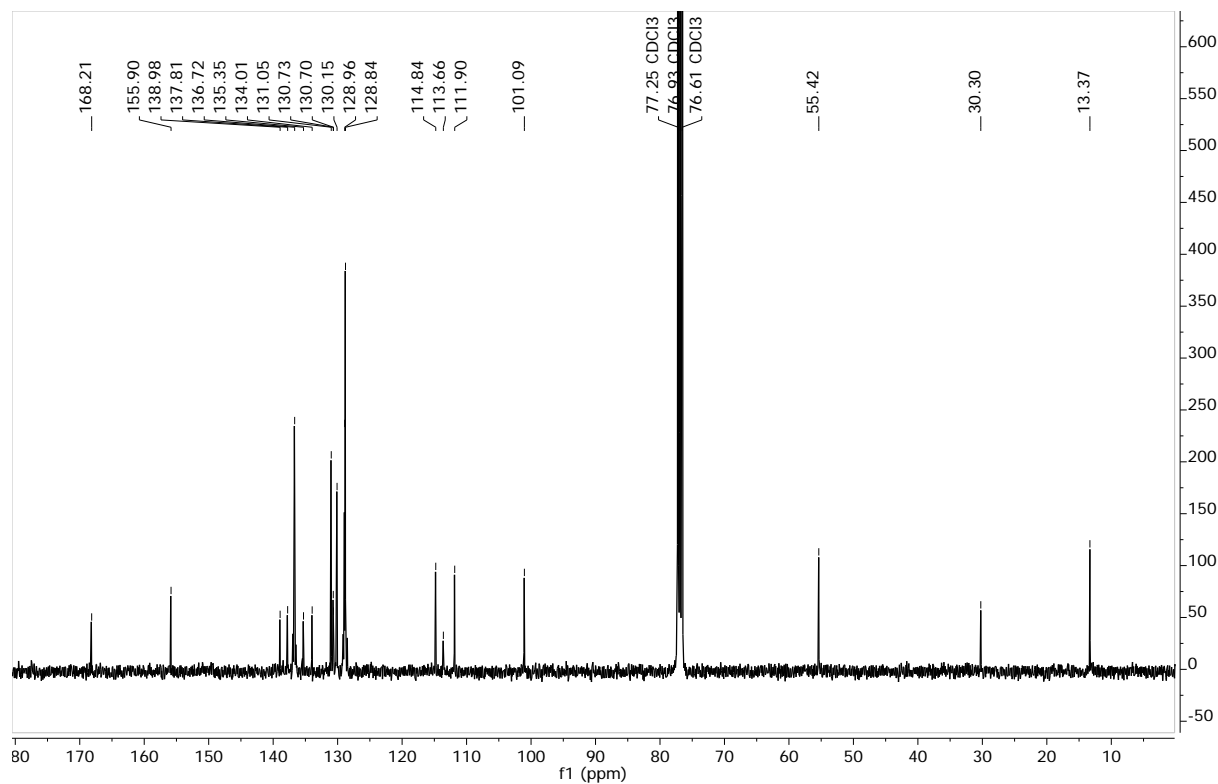

**Figure S2.**  $^{13}\text{C}\{^1\text{H}\}$  NMR spectrum of  $[\text{Ph}_3\text{Sn}(\text{IND})]$  in  $\text{CDCl}_3$ .

**$^{13}\text{C}\{^1\text{H}\}$  NMR ( $\text{CDCl}_3$ , ppm, 100.6 MHz):**  $\delta$  = 168.2 (qC, CO), 155.9 (qC,  $\text{C}_{\text{aryl}}$ ), 138.9 (qC,  $\text{C}_{\text{aryl}}$ ), 137.8 (qC,  $\text{C}_{\text{aryl}}$ ), 136.7 (CH,  $\text{C}_{\text{aryl}}$ ), 135.4 (qC,  $\text{C}_{\text{aryl}}$ ), 134 (qC,  $\text{C}_{\text{aryl}}$ ), 131 (CH,  $\text{C}_{\text{aryl}}$ ), 130.7 (qC,  $\text{C}_{\text{aryl}}$ ), 130.7 (qC,  $\text{C}_{\text{aryl}}$ ), 130.2 (qC,  $\text{C}_{\text{aryl}}$ ), 128.9 (CH,  $\text{C}_{\text{aryl}}$ ), 128.8 (CH,  $\text{C}_{\text{aryl}}$ ), 114.8 (qC,  $\text{C}_{\text{aryl}}$ ), 113.7 (CH,  $\text{C}_{\text{aryl}}$ ), 111.9 (CH,  $\text{C}_{\text{aryl}}$ ), 101 (CH,  $\text{C}_{\text{aryl}}$ ), 55.4 ( $\text{CH}_3$ , OCH<sub>3</sub>), 30.3 ( $\text{CH}_2$ ), 13.4 ( $\text{CH}_3$ ).

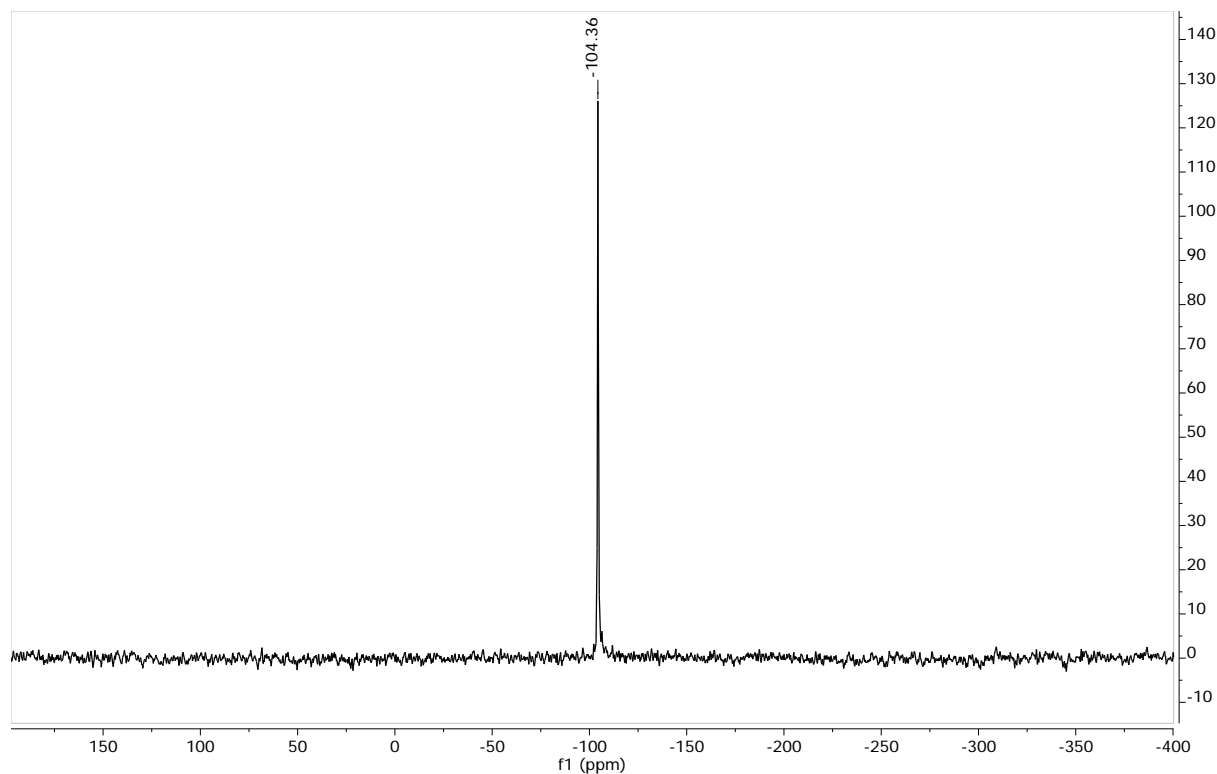

**Figure S3.**  $^{119}\text{Sn}\{^1\text{H}\}$  NMR spectrum of  $[\text{Ph}_3\text{Sn}(\text{IND})]$  in  $\text{CDCl}_3$ .

$^{119}\text{Sn}\{^1\text{H}\}$  NMR ( $\text{CDCl}_3$ , ppm, 149.2 MHz):  $\delta = -104.36$ .

Mass Spectrum of  $[\text{Ph}_3\text{Sn}(\text{IND})]$

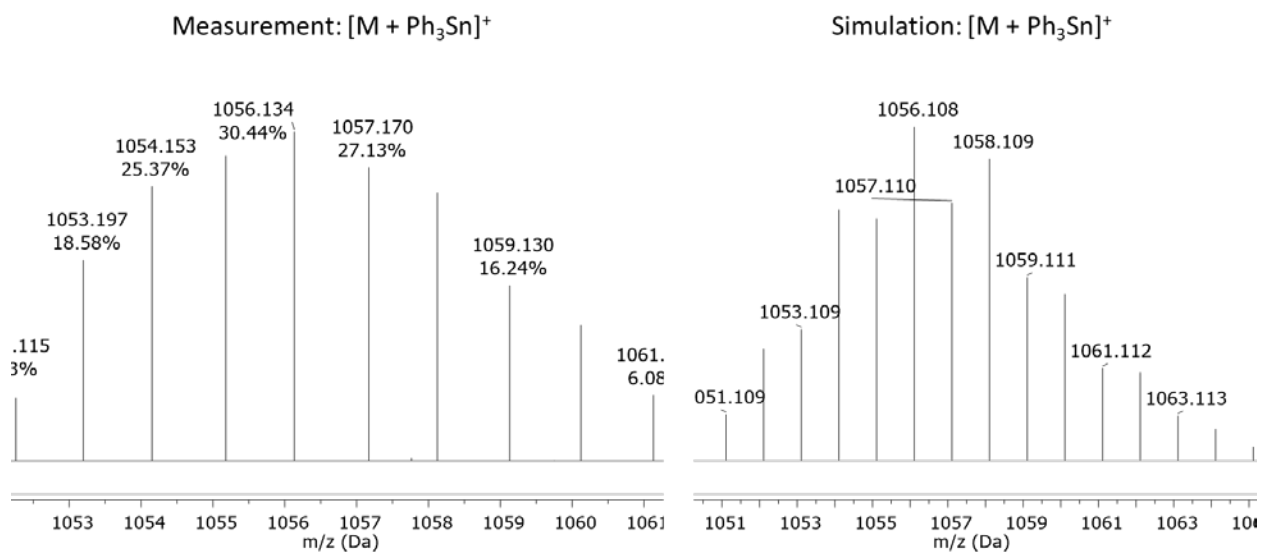

**Figure S4.** HR-ESI-MS (positive mode,  $\text{CH}_3\text{OH}$ ),  $m/z$   $[\text{M} + \text{Ph}_3\text{Sn}]^+$ .

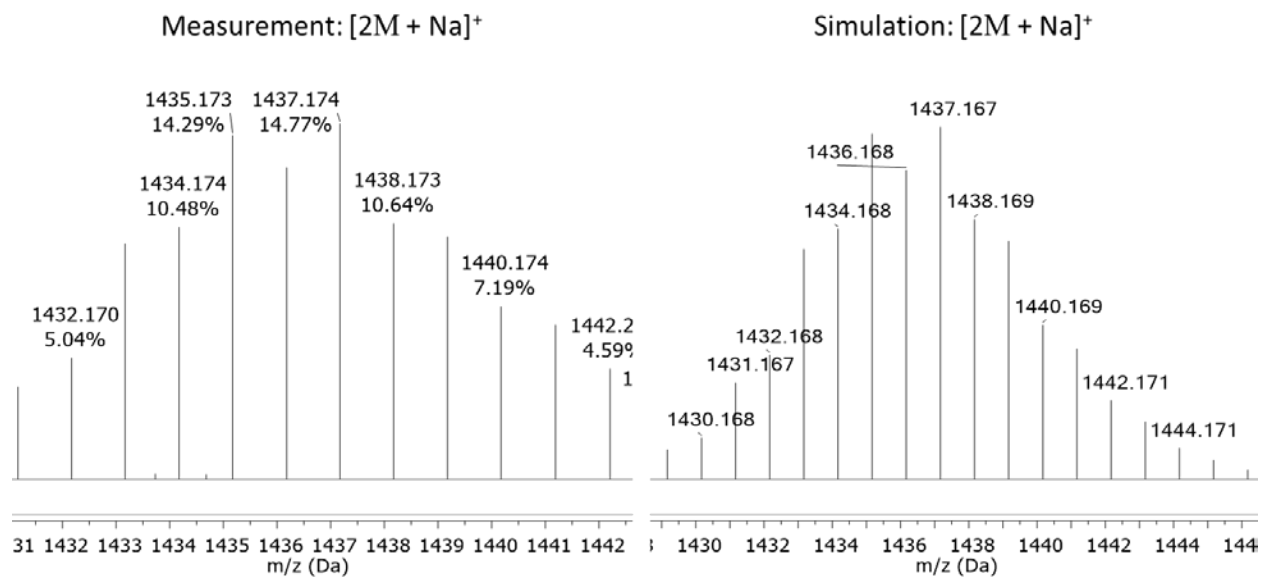

**Figure S5.** HR-ESI-MS (positive mode, CH<sub>3</sub>OH),  $m/z$  [2M + Na]<sup>+</sup>.

**HR-ESI-MS (positive mode, CH<sub>3</sub>OH):**  $m/z$  [M+Ph<sub>3</sub>Sn]<sup>+</sup>: calcd. for C<sub>55</sub>H<sub>45</sub>ClNO<sub>4</sub>Sn<sub>2</sub>: 1056.108, found: 1056.134;  $m/z$  [2M+Na]<sup>+</sup>: calcd. for C<sub>74</sub>H<sub>60</sub>Cl<sub>2</sub>N<sub>2</sub>O<sub>8</sub>Sn<sub>2</sub>Na: 1437.167, found: 1437.174; the observed isotopic pattern is in agreement with the calculated one.

## X-ray Crystallography

**Table S1.** Crystal data and structure refinement of [Ph<sub>3</sub>Sn(IND)]

|                                                        |                                                                                |
|--------------------------------------------------------|--------------------------------------------------------------------------------|
| Empirical Formula                                      | C <sub>39.50</sub> H <sub>32.50</sub> Cl <sub>8.50</sub> NO <sub>4</sub> Sn    |
| Molecular Formula                                      | [C <sub>37</sub> H <sub>30</sub> ClNO <sub>4</sub> Sn] · 2.5 CHCl <sub>3</sub> |
| Formula weight [g mol <sup>-1</sup> ]                  | 1005.18                                                                        |
| T [K]                                                  | 130(2)                                                                         |
| Crystal system                                         | Tetragonal                                                                     |
| Space group                                            | <i>I</i> 4 <sub>1</sub> / <i>a</i>                                             |
| Unit cell dimensions                                   |                                                                                |
| <i>a</i> [Å]                                           | 31.6697(7)                                                                     |
| <i>b</i> [Å]                                           | 31.6697(7)                                                                     |
| <i>c</i> [Å]                                           | 16.8632(5)                                                                     |
| α [°]                                                  | 90                                                                             |
| β [°]                                                  | 90                                                                             |
| γ [°]                                                  | 90                                                                             |
| Volume [Å <sup>3</sup> ]                               | 16913.3(9)                                                                     |
| <i>Z</i>                                               | 16                                                                             |
| ρ (calc.) [Mg m <sup>-3</sup> ]                        | 1.579                                                                          |
| μ [mm <sup>-1</sup> ]                                  | 1.182                                                                          |
| F(000)                                                 | 8048                                                                           |
| Crystal size [mm <sup>3</sup> ]                        | 0.40 x 0.10 x 0.05                                                             |
| Θ <sub>min</sub> – Θ <sub>max</sub> [°]                | 1.819 – 30.421                                                                 |
| Index ranges                                           | -44 ≤ <i>h</i> ≤ 42<br>-42 ≤ <i>k</i> ≤ 39<br>-23 ≤ <i>l</i> ≤ 23              |
| Reflections collected                                  | 81150                                                                          |
| Independent reflections [ <i>R</i> <sub>(int)</sub> ]  | 11803 [0.0899]                                                                 |
| Completeness (Θ [°])                                   | 100.0% (28.285)                                                                |
| <i>T</i> <sub>Max</sub> / <i>T</i> <sub>Min</sub>      | 1.00000 / 0.53444                                                              |
| Data / restraints / parameters                         | 11803 / 381 / 732                                                              |
| Goof [on F <sup>2</sup> ]                              | 1.045                                                                          |
| <i>R</i> 1, <i>wR</i> 2 [ <i>I</i> > 2 σ ( <i>I</i> )] | 0.0607, 0.1520                                                                 |
| <i>R</i> 1, <i>wR</i> 2 (all data)                     | 0.1165, 0.1837                                                                 |
| Residual electron density [e·Å <sup>-3</sup> ]         | 1.269 / -0.713                                                                 |
| CCDC deposition number                                 | 2226528                                                                        |

# NMR Spectra of [Ph<sub>3</sub>Sn(FBP)]

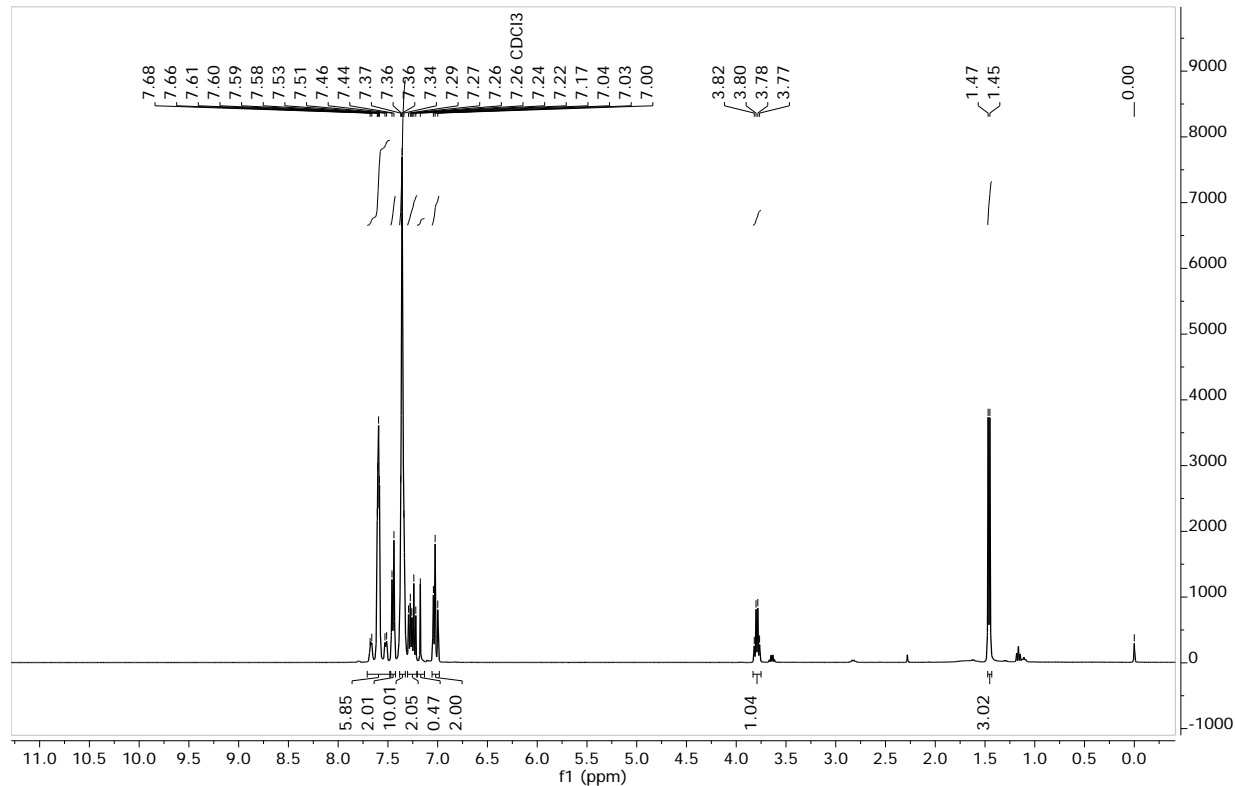

**Figure S6.** <sup>1</sup>H NMR spectrum of [Ph<sub>3</sub>Sn(FBP)] in CDCl<sub>3</sub>.

**<sup>1</sup>H NMR (CDCl<sub>3</sub>, ppm, 400 MHz):**  $\delta$  = 7.68 – 7.51 (m, br., 6H, CH<sub>aryl</sub>), 7.45 (d, <sup>3</sup>J<sub>HH</sub> = 8 Hz, 2H, CH<sub>aryl</sub>), 7.37 – 7.34 (m, br., 10H, CH<sub>aryl</sub>), 7.28 (d, <sup>3</sup>J<sub>HH</sub> = 8 Hz, 1H, CH<sub>aryl</sub>), 7.24 (t, <sup>3</sup>J<sub>HH</sub> = 8 Hz, 1H, CH<sub>aryl</sub>), 7.17 (s, 1H, CH<sub>aryl</sub>), 7.03 (t, <sup>3</sup>J<sub>HH</sub> = 8 Hz, 2H, CH<sub>aryl</sub>), 3.79 (q, <sup>3</sup>J<sub>HH</sub> = 8 Hz, 1H, CH), 1.46 (d, <sup>3</sup>J<sub>HH</sub> = 8 Hz, 3H, CH<sub>3</sub>).

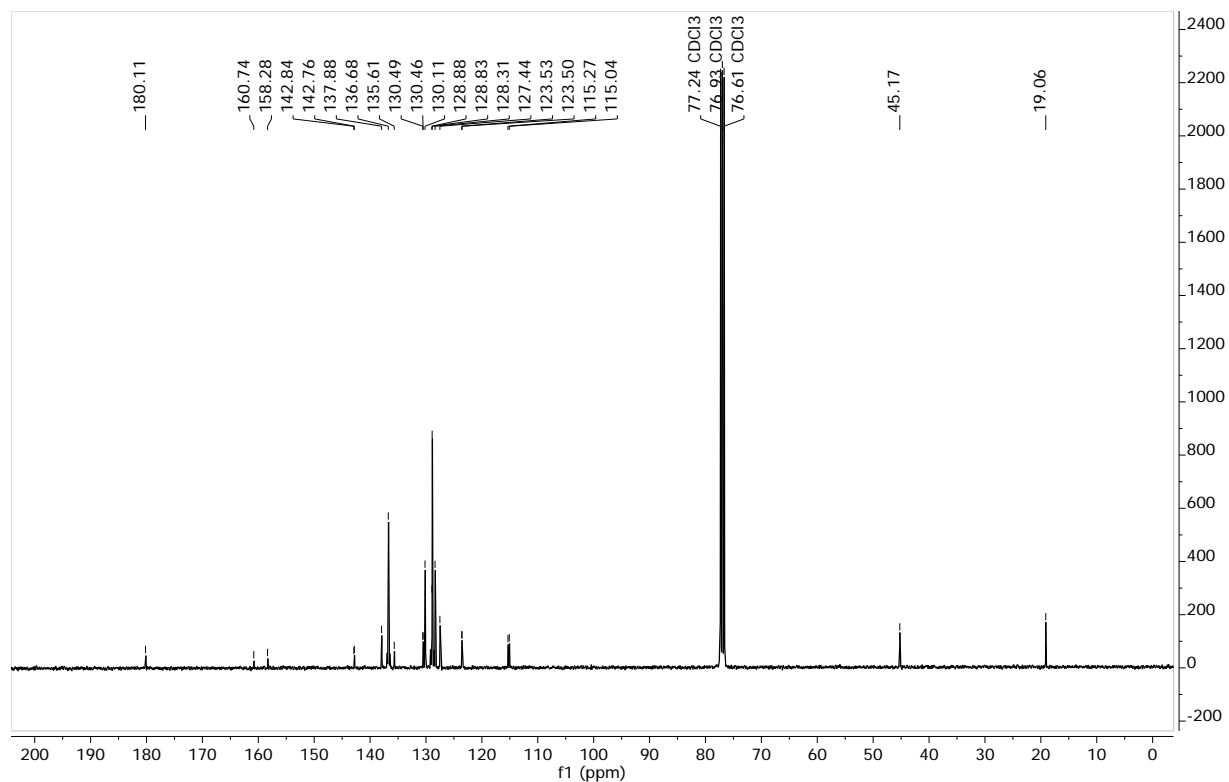

**Figure S7.**  $^{13}\text{C}\{^1\text{H}\}$  NMR spectrum of  $[\text{Ph}_3\text{Sn}(\text{FBP})]$  in  $\text{CDCl}_3$ .

**$^{13}\text{C}\{^1\text{H}\}$  NMR ( $\text{CDCl}_3$ , ppm, 100.6 MHz):**  $\delta$  = 180.1 (qC, COOH), 160.7 (qC,  $\text{C}_{\text{aryl}}$ ), 158.3 (qC,  $\text{C}_{\text{aryl}}$ ), 142.8 (qC,  $\text{C}_{\text{aryl}}$ ), 137.9 (CH,  $\text{C}_{\text{aryl}}$ ), 136.7 (CH,  $\text{C}_{\text{aryl}}$ ), 135.6 (qC,  $\text{C}_{\text{aryl}}$ ), 130.5 (qC,  $\text{C}_{\text{aryl}}$ ), 130.1 (CH,  $\text{C}_{\text{aryl}}$ ), 128.9 (CH,  $\text{C}_{\text{aromat}}$ ), 128.3 (CH,  $\text{C}_{\text{aryl}}$ ), 127.4 (CH,  $\text{C}_{\text{aryl}}$ ), 123.5 (CH,  $\text{C}_{\text{aryl}}$ ), 115.3 (CH,  $\text{C}_{\text{aryl}}$ ), 115.0 (CH,  $\text{C}_{\text{aryl}}$ ), 45.2 (CH), 19.1 ( $\text{CH}_3$ ).



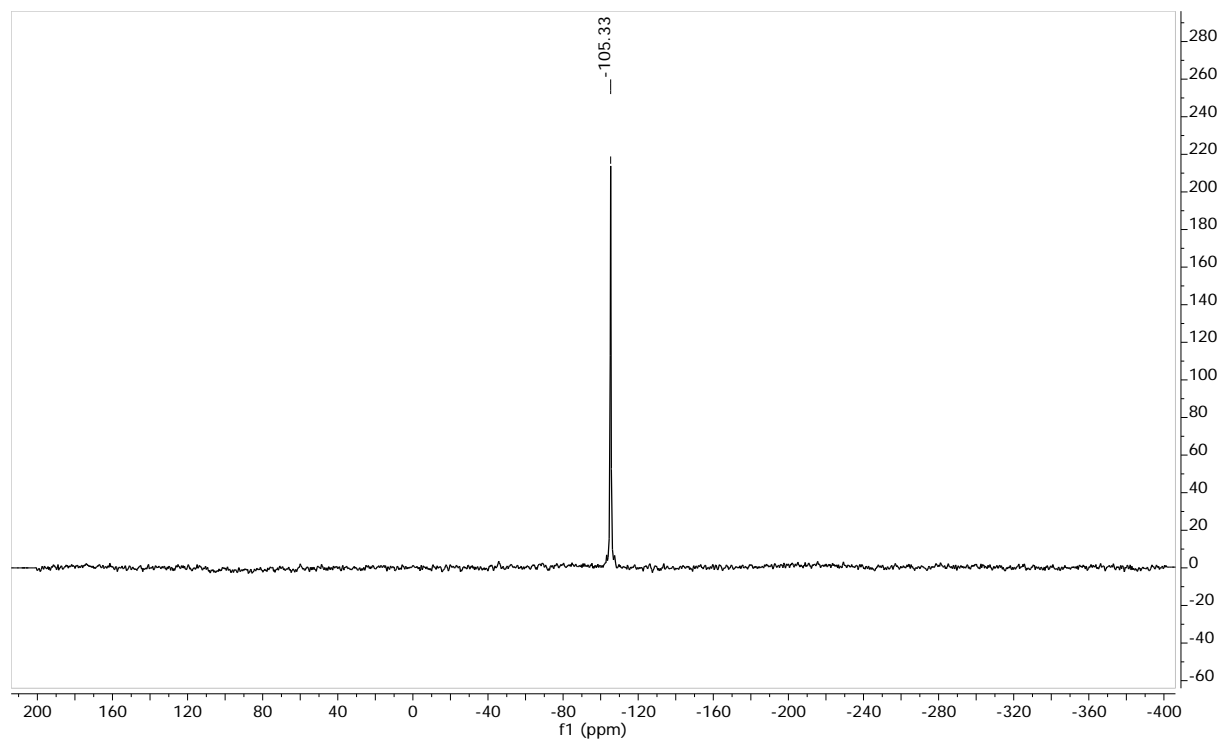

**Figure S8.**  $^{119}\text{Sn}\{^1\text{H}\}$  NMR spectrum of  $[\text{Ph}_3\text{Sn}(\text{FBP})]$  in  $\text{CDCl}_3$ .

$^{119}\text{Sn}\{^1\text{H}\}$  NMR ( $\text{CDCl}_3$ , ppm, 149.2 MHz):  $\delta = -105.33$ .

## Mass Spectra of [Ph<sub>3</sub>Sn(FBP)]

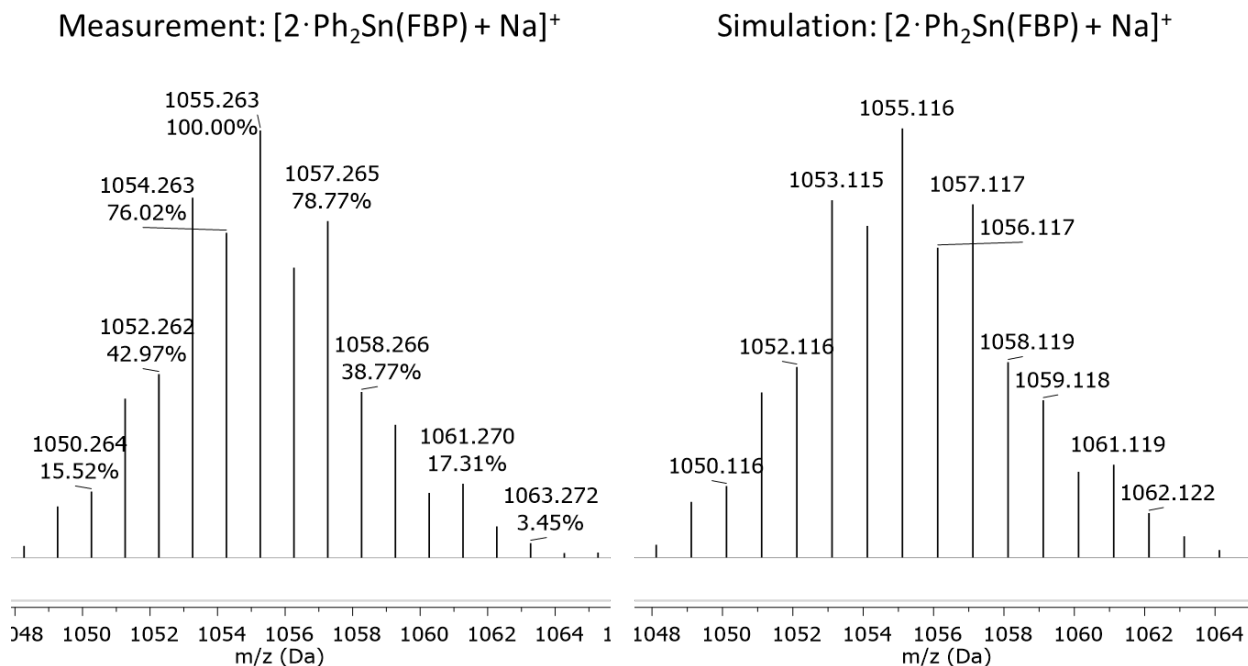

**Figure S9.** HR-ESI-MS (positive mode, CH<sub>3</sub>OH), *m/z* [2·Ph<sub>2</sub>Sn(FBP) + Na]<sup>+</sup>.

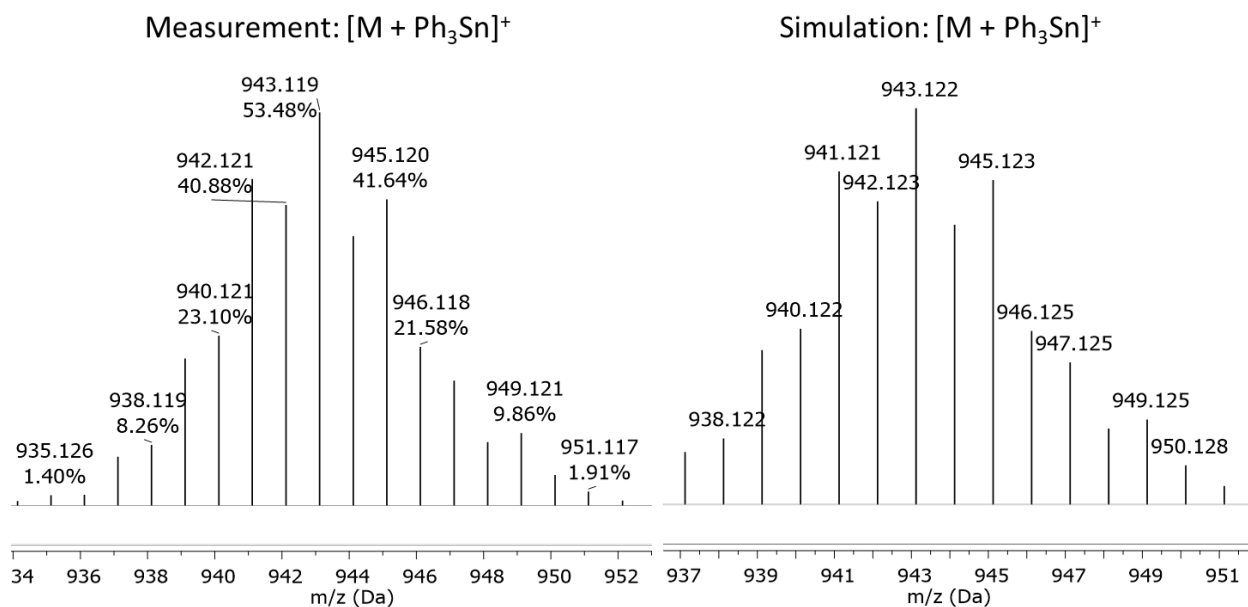

**Figure S10.** HR-ESI-MS (positive mode, CH<sub>3</sub>OH), *m/z* [M + Ph<sub>3</sub>Sn]<sup>+</sup>.

**HR-ESI-MS (positive mode, CH<sub>3</sub>OH):** *m/z* [2·Ph<sub>2</sub>Sn(FBP)+Na]<sup>+</sup>: calcd. for C<sub>54</sub>H<sub>44</sub>F<sub>2</sub>O<sub>4</sub>Sn<sub>2</sub>: 1055.116, found: 1055.263; *m/z* [M+Ph<sub>3</sub>Sn]<sup>+</sup>: calcd. for C<sub>51</sub>H<sub>42</sub>FO<sub>2</sub>Sn<sub>2</sub>: 943.122, found: 943.119; the observed isotopic pattern is in agreement with the calculated one.

## Stability of complexes $[\text{Ph}_3\text{Sn}(\text{IND})]$ and $[\text{Ph}_3\text{Sn}(\text{FBP})]$ in DMSO

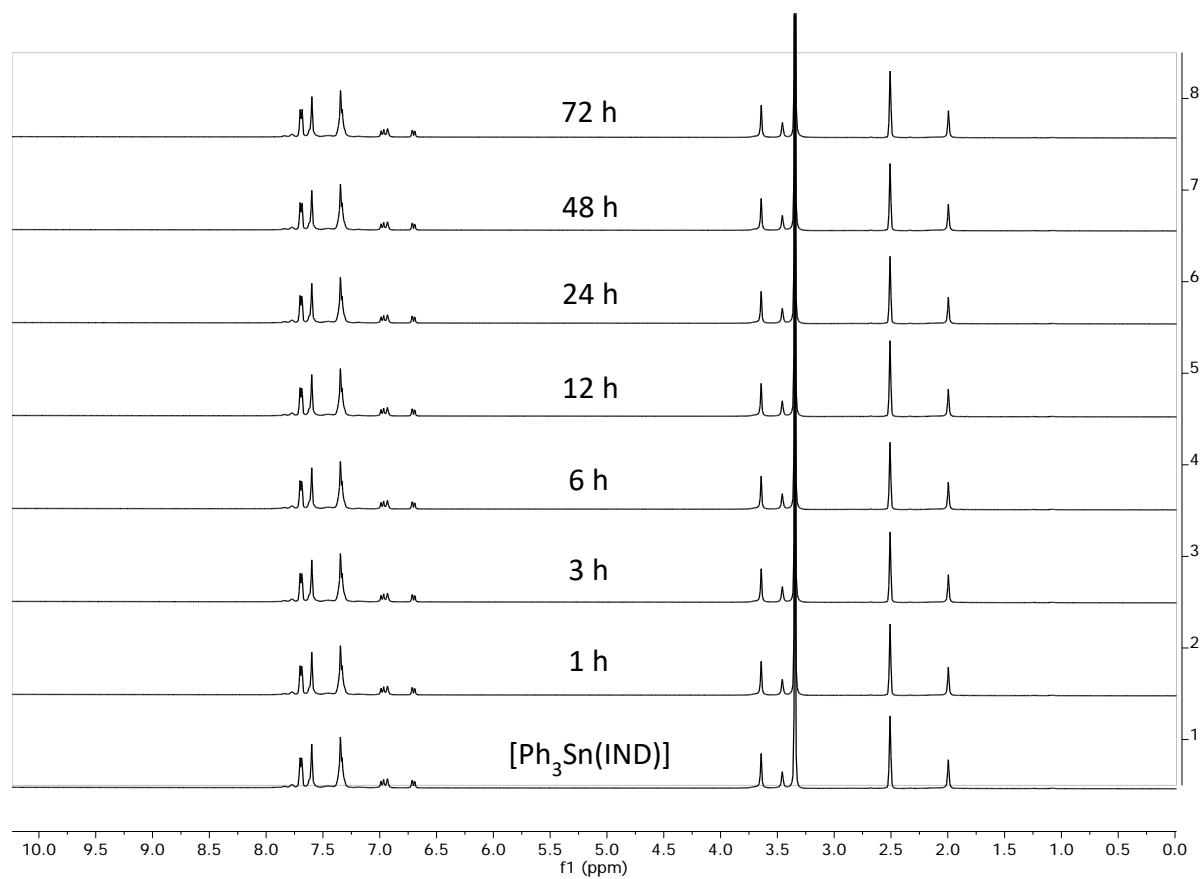

**Figure S11.** Stability of  $[\text{Ph}_3\text{Sn}(\text{IND})]$  in  $\text{DMSO}-d_6$  over 72 h; time-resolved  $^1\text{H}$  NMR spectra.

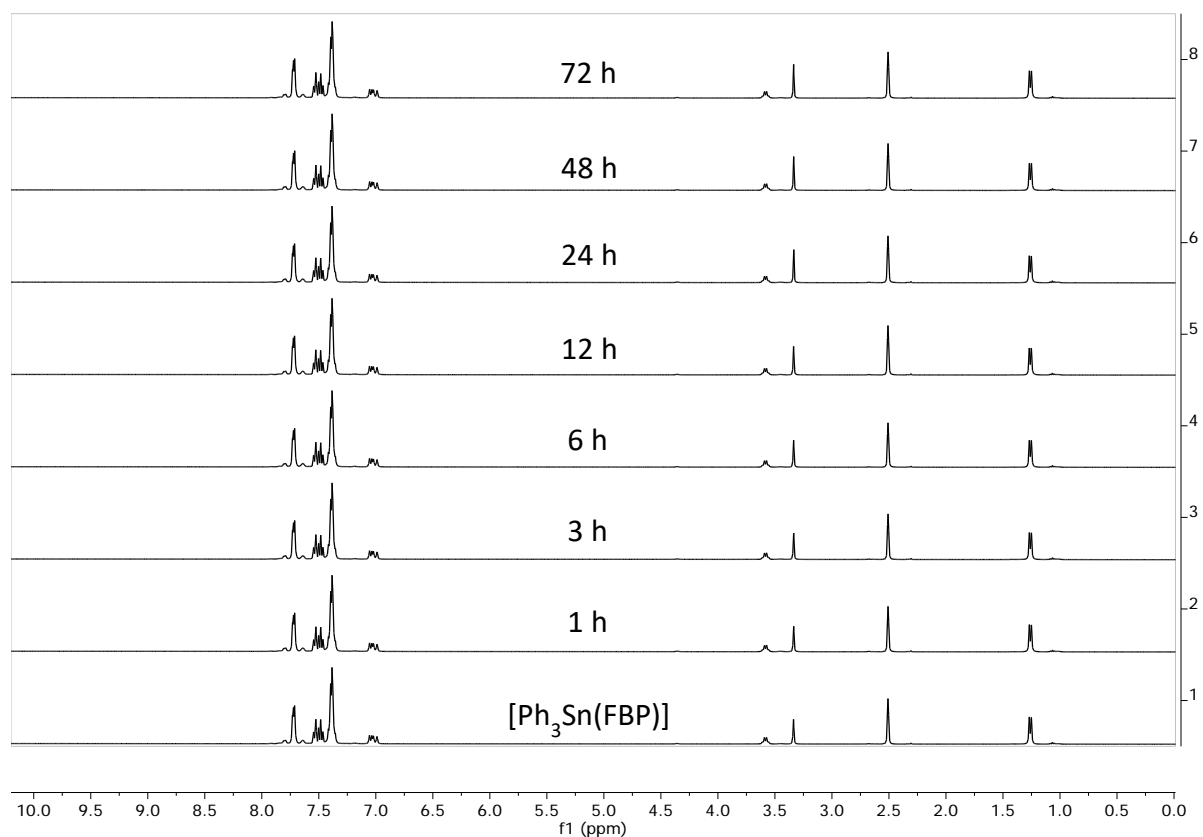

**Figure S12.** Stability of  $[\text{Ph}_3\text{Sn}(\text{FBP})]$  in  $\text{DMSO-}d_6$  over 72 h; time-resolved  $^1\text{H}$  NMR spectra.

### Cell viability of complexes

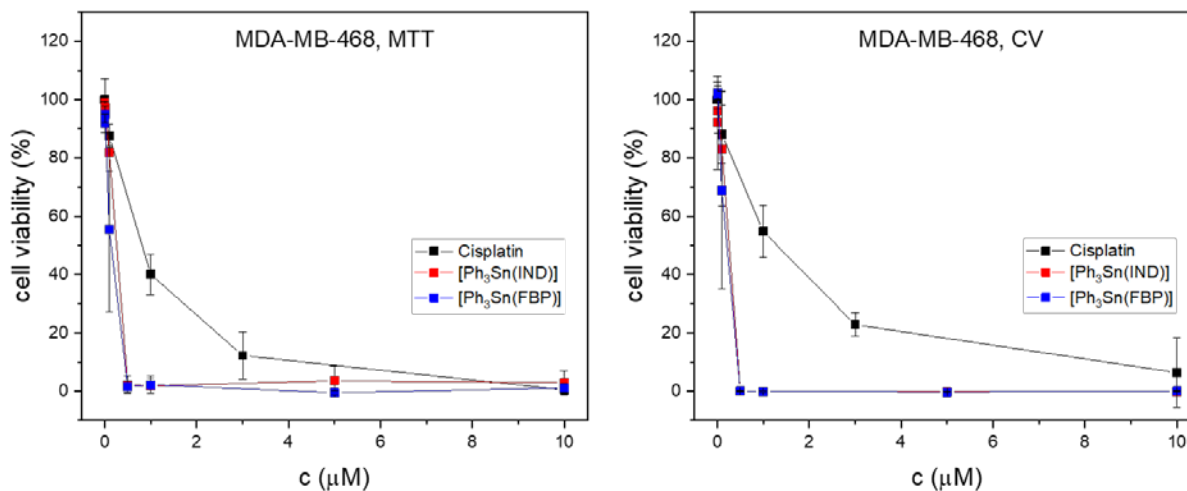

**Figure S13.** Cell viability of  $[\text{Ph}_3\text{Sn}(\text{IND})]$ ,  $[\text{Ph}_3\text{Sn}(\text{FBP})]$  and cisplatin determined by MTT and CV assays in MDA-MB-468 breast cancer cell line.

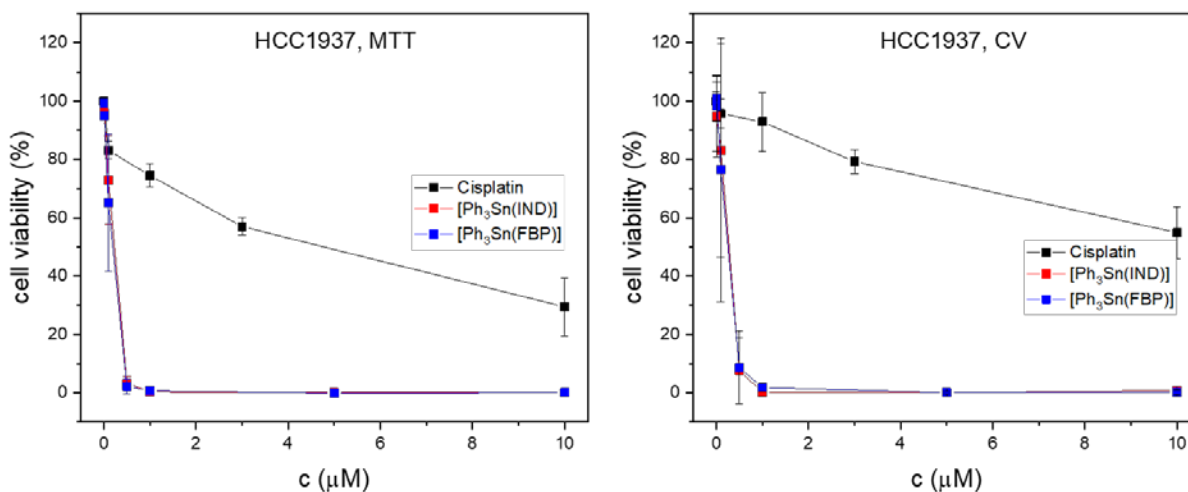

**Figure S14.** Cell viability of [Ph<sub>3</sub>Sn(IND)], [Ph<sub>3</sub>Sn(FBP)] and cisplatin determined by MTT and CV assays in HCC1937 breast cancer cell line.

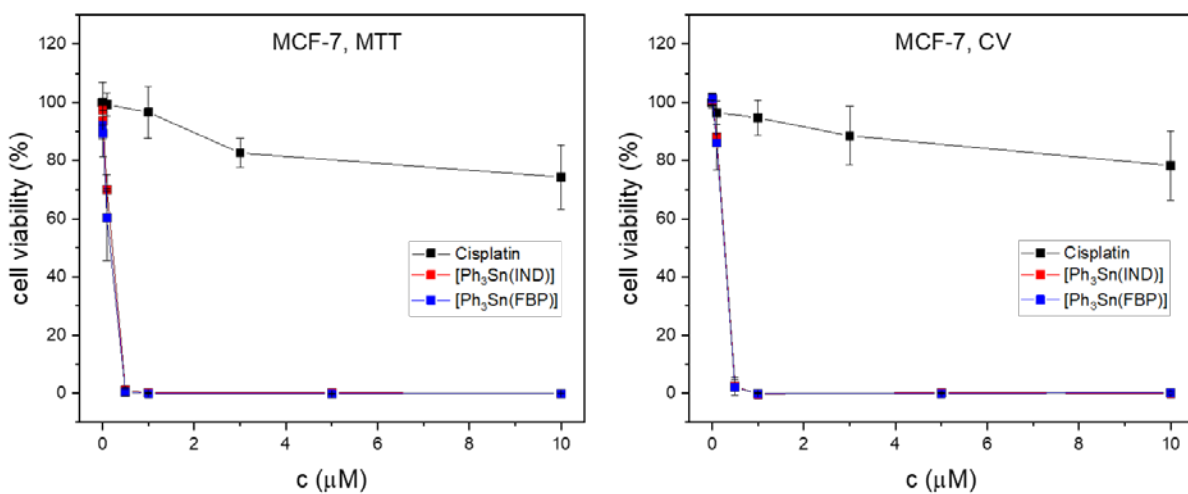

**Figure S15.** Cell viability of [Ph<sub>3</sub>Sn(IND)], [Ph<sub>3</sub>Sn(FBP)] and cisplatin determined by MTT and CV assays in MCF-7 breast cancer cell line.

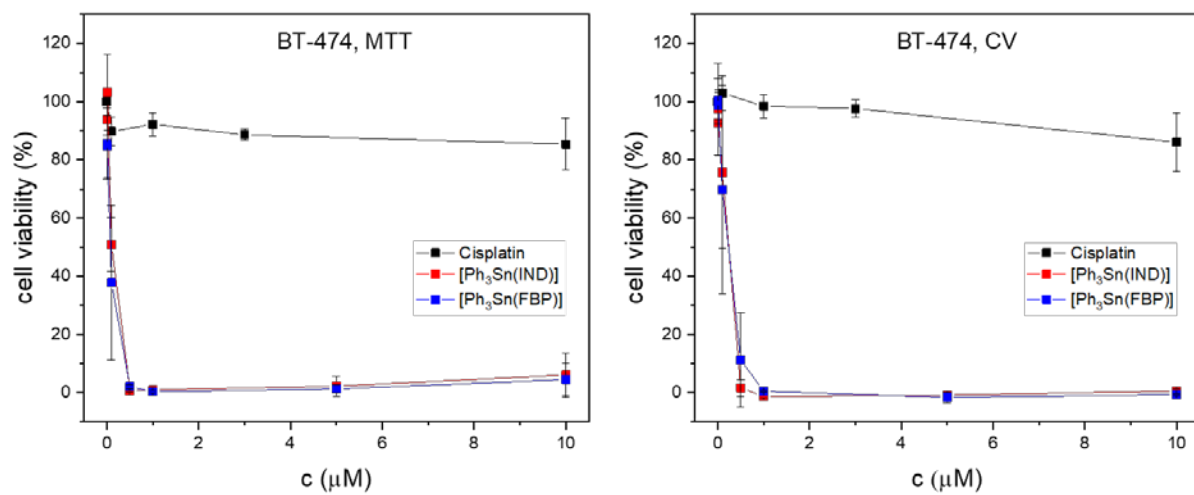

**Figure S16.** Cell viability of [Ph<sub>3</sub>Sn(IND)], [Ph<sub>3</sub>Sn(FBP)] and cisplatin determined by MTT and CV assays in BT-474 breast cancer cell line.
